# Supplementary material for: Panchromatic light harvesting by N719 with a porphyrin molecule for high-performance dye-sensitized solar cells
Source: Royal Society of Chemistry journal article supplement (doi:10.1039/c3tc32191f), 2014-01-01
Supplement: c3tc32191f1.pdf [file c3tc32191f1.pdf]

## Supporting Information

### **Panchromatic Light Harvesting by N719 with a Porphyrin Molecule for High-Performance Dye-Sensitized Solar Cells**

Shuai Chang,<sup>a†</sup> Hongda Wang,<sup>b†</sup> Lawrence Tien Lin Lee,<sup>a</sup> Shizhao Zheng,<sup>a</sup> Quan Li,<sup>a</sup> King Young Wong,<sup>a</sup> Wai-Kwok Wong,<sup>b</sup> Xunjin Zhu,<sup>\*b</sup> Wai-Yeung Wong,<sup>\*b</sup> Xudong Xiao,<sup>\*a</sup> and Tao Chen<sup>\*a</sup>

<sup>a</sup> Department of Physics, The Chinese University of Hong Kong, Shatin, Hong Kong, China. Fax: 852- 2603 5204; Tel: 852-3943 6278; E-mail: taochen@phy.cuhk.edu.hk (T. C); xdxiao@phy.cuhk.edu.hk (X. D. X).

<sup>b</sup> Institute of Molecular Functional Materials, Department of Chemistry and Institute of Advanced Materials, Hong Kong Baptist University, Waterloo Road, Kowloon Tong, Hong Kong, China. Fax: 852-3411 7048; Tel: 852-3411 5157; E-mail: rwywong@hkbu.edu.hk (W. Y. W); xjzhu@hkbu.edu.hk (X. J. Z).

### Supporting Characterizations

**Table S1** Absorption wavelength, fluorescence maxima and porphyrin redox potentials of HD 18 in THF

| Dyes | Absorption/ $\lambda_{\max}$ /nm ( $\epsilon, \times 10^5 \text{M}^{-1} \text{cm}^{-1}$ ) | Emission $\lambda_{\max}$ /nm <sup>a</sup> | $E_{\text{ox}}/\text{V}^{\text{b}}$ | $E_{0-0}/\text{V}^{\text{c}}$ | $E_{\text{re}}/\text{V}^{\text{d}}$ |
|------|-------------------------------------------------------------------------------------------|--------------------------------------------|-------------------------------------|-------------------------------|-------------------------------------|
| HD18 | 456(1.67), 666(0.47)                                                                      | 679                                        | +0.59,<br>+0.80                     | 1.74                          | -1.15                               |

<sup>a</sup> Excitation wavelengths /nm: HD18, 456. <sup>b</sup> HOMO level was measured in THF with 0.1 M tetrabutylammonium hexafluorophosphate (TBAPF<sub>6</sub>). <sup>c</sup>  $E_{0-0}$  was estimated from the absorption threshold of dye in THF. <sup>d</sup> The LUMO was calculated using the equation LUMO = HOMO -  $E_{0-0}$ .

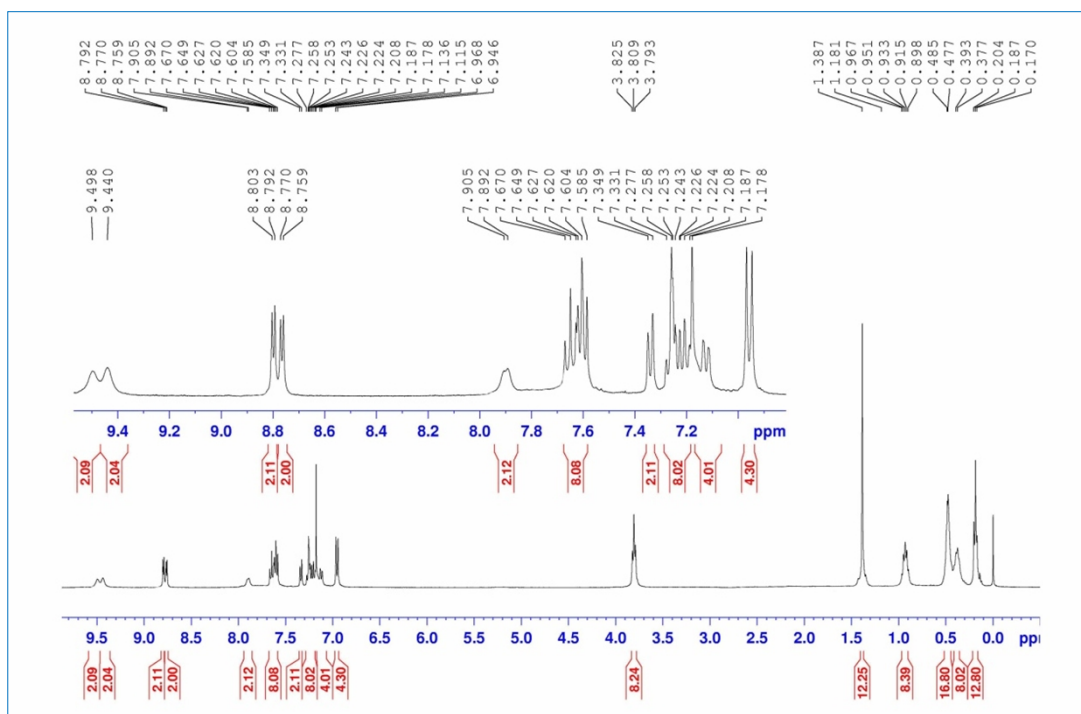

Fig. S1 <sup>1</sup>H NMR spectrum of HD18.

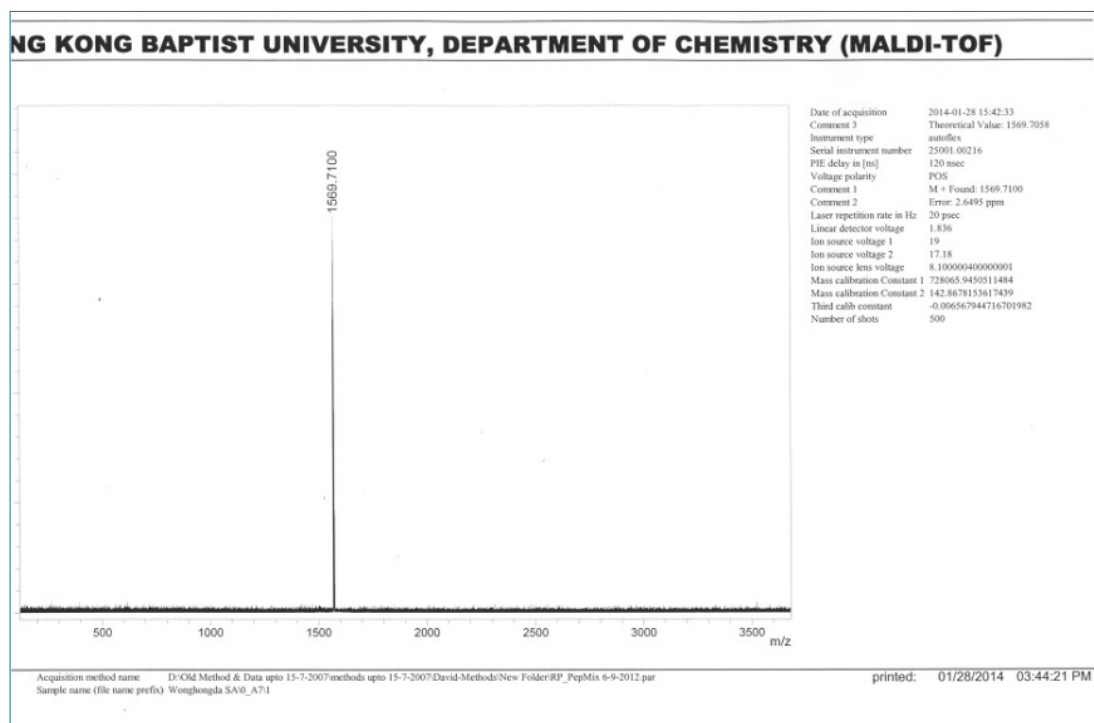

Fig. S2 ESI-HRMS of HD18.

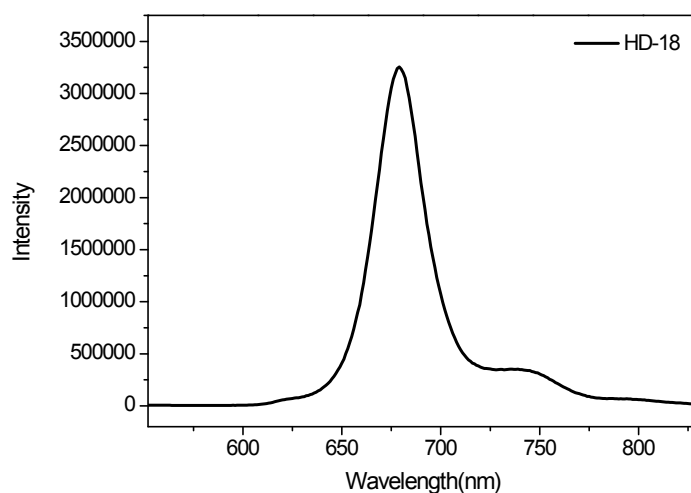

**Fig. S3** Fluorescence spectra of HD18 measured in THF. Experimental conditions:  $1 \times 10^{-6}$  M.

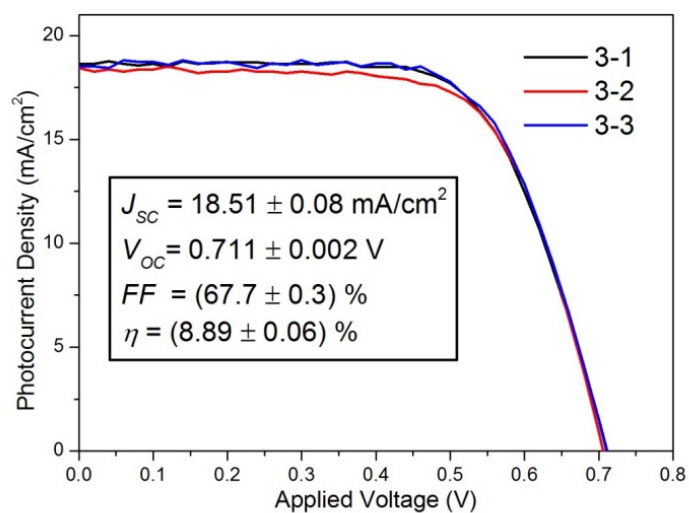

**Fig. S4** Three identical co-sensitized devices denoted as 3-1, 3-2 and 3-3. The inset chart gives their average  $J_{sc}$ ,  $V_{oc}$ , fill factor ( $FF$ ) and PCE ( $\eta$ ) parameters with the margin of error.

**Table S2.** Simulated device parameters from the EIS data in Fig. 3a in main text

| Device   | $R_{CT}(\Omega)$ | $f(\text{Hz})$ | $\tau(\text{ms})$ |
|----------|------------------|----------------|-------------------|
| <b>1</b> | 52.2             | 32.56          | 4.89              |
| <b>2</b> | 196.4            | 10.30          | 15.45             |
| <b>3</b> | 142.1            | 13.01          | 12.23             |
